# Supplementary material
Source: publisher figshare collection journal article supplement (https://wiley.figshare.com/articles/dataset/_/3524753)
Supplement: Supplementary file 1 [file 1 › appendix-A.htm]

Ecological Archives E086-086-A1


### *Ecological Archives* E086-086-A1

### **James R. Vonesh and Benjamin M. Bolker. 2005. Compensatory larval responses shift trade-offs associated with predator-induced hatching plasticity. *Ecology* 86:1580–1591.**

Appendix A. Estimating
the effect of egg-predation on larval densities with photographs of the field
site, *Hyperolius spinigularis* and egg-stage predators. A
pdf file of this appendix is also available.

*Establishing
the egg-predation mediated density effect: N-EP and N+EP1,
N+EP2*--Initial tadpole densities in the experimental trials were based upon
field estimates of average clutch size, clutch density, the number of clutches
attacked by each predator type, and the average survivorship of undisturbed
versus attacked clutches.  These parameters were estimated by monitoring
reproductive effort and clutch survival along two randomly located 3 × 30
m transects in Amani Pond between October 2001 and the start of the experiment
in April 2002.

The density of tadpoles in the absence
of egg predators (N-EP) was estimated from the mean clutch density
(; clutches/ m2),
the average clutch size (;
egg/clutch), and the mean proportional survival to hatching of embryos in clutches
that are not attacked [E;
thus, N-EP = ()()(E)]. 
The density of tadpoles in the presence of egg predators (N+AF, N+TY)
was estimated by including the proportion of the total clutches attacked by
each predator (+AF,(+TY)
and the expected survival of embryos  in clutches attacked by that predator
(+AF, +TY). 
For example, initial density given the effects of *A. fornasini* (N+AF)
was the larval contribution of clutches that are not attacked [()(1-
 AF)()(E)],
plus the contribution of clutches that are attacked [()(AF)()(AF)]. 
Standard deviations for initial densities were calculated from the standard
deviations of each of the estimated parameters, using standard rules for error
propagation (Lyons 1991).

*Hyperolius spinigularis* breeding
activity during the long rainy season 2002 began on 4 March.  From the
start of breeding to the start of the experiment, *H. spinigularis* clutch
densities () in Amani Pond
averaged 0.49 ± SD 0.27 clutches per m2
and 10-day period.  *Hyperolius spinigularis* clutch size ()
for the same period averaged 83.94 ± SD 21.9 embryos/clutch
(*n* = 123), and the average proportional survival of embryos in clutches
not attacked by egg-stage predators (E)
was 0.91 ± SD 0.20 (*n* = 29).  Thus,
field estimates of larval density in the absence of predatorswere
37.43 ± SD 24.18 larvae/m2; in our
experimental tanks N-EP densities were set at 38.8 larvae/m2
(i.e., 35 larvae/ tank).  *Afrixalus fornasini* are known predators
of arboreal frog eggs (Drewes and Altig 1996), and at this site attacked (AF)
an average of 0.73 ± SD 0.18 clutches 10/brood. 
Survival of embryos in the attacked clutches (AF)
averaged 0.14 ± SD 0.19 (*n* = 86). 
Thus, the field estimate for initial larval density in the presence of *A.
fornasini* predation was 14.1 ± SD 11.27 larvae/
m2.  In our experimental tanks N+AF densities were
11.11 larvae/m2 (10 larvae/tank).

Ephydrid flies of the genus *Typopsilopa*
prey upon the arboreal eggs of several East African hyperoliid species (Vonesh
2000) including *H. spinigularis* in Amani (Vonesh 2003).  However,
early in the 2002 breeding season, when this experiment was being set up, egg-predation
by *Typopsilopa* was rare and only increased late in the breeding season
(Vonesh 2003).  Thus, experimental densities reflecting *Typopsilopa*predation (N+TY) were based on predation estimates for four *Hyperolius*
species from two ponds in Kibale National Park (Vonesh 2000) and *H. spinigularis*
in Amani in late spring 2000 (Vonesh, *unpublished data*).  Based
on these data, *Typopsilopa* flies attacked (TY)
an average of 0.27 ± SD 0.14 (*n* = 9 site × species
combinations) of the available clutches.  Proportional survival of embryos
in attacked *H. spinigularis* clutches (TY)
averaged 0.21 ± SD 0.3 (*n* = 10 clutches
from spring 2002).  Thus, field estimates for initial larval density in
the presence of fly egg-predation were 29.3 ± SD
18.6 larvae/m2.  In our experimental tanks N+TY densities
were 27.8 larvae/m2 (25 larvae/tank).

> |  |
> | --- |
> |  |
> |  |
> | FIG. A1. (A). Amani Pond, Amani Nature Reserve, East Usambara Mountians, NE Tanzania. (B). Cup placed under *H. spinigularis* clutch to catch hatchlings. |

---

> |  |
> | --- |
> |  |
> |  |
> | FIG. A2. Life history of *Hyperolius  spinigularis*. (A). An adult male. (B). An adult female on a recently oviposited clutch. (C). A clutch in the process of hatching, larvae dropping into the pond. (D). Newly hatched larvae. |

---

> |  |
> | --- |
> |  |
> |  |
> | FIG. A3.  (A). *Afrixalus fornasini* adult female.  (B). *A. fornasini* preying upon a *H. spinigularis* clutch. |

---

> |  |
> | --- |
> |  |
> |  |
> | FIG. A4. *Typopsilopa* sp. dipteran predator. (A). Adult fly. (B). Adult female fly ovipositing *Hyperolius puncticulatus* clutch. (C). Close-up of *Typopsilopa* eggs next to *H. spinigularis* embryo (~ Gosner stage 10). (D). Close-up of *Typopsilopa* larvae in *H. spinigularis* clutch.  A 1-m scale is provided for approximate reference. |

LITERATURE CITED

Drewes, R. C., and R. Altig. 1996. Anuran egg predation and heterocannibalism in a breeding community of East African frogs. Tropical Zoology **9**:333–347.

Lyons, L. 1991. A practical guide to data analysis for physical science students. Cambridge University Press Cambridge, UK.

Vonesh, J. R. 2000. Dipteran predation on the eggs of four *Hyperolius* frog species in western Uganda. Copeia 2000:560–566.

Vonesh, J. R. 2003. Density- and trail-mediated effects of predators across life history stages. Dissertation. University of Florida, Gainesville, Florida, USA.

---

  
[Back to E086-086]
